# Supplementary material for: Combination of the neutrophil to lymphocyte ratio and serum toluidine red unheated serum test titer as a predictor of neurosyphilis in HIV-negative patients
Source: PubMed Central journal article supplement — Exp Ther Med. 2021 Jan 7;21(3):185. doi: 10.3892/etm.2021.9616 (PMC7812589; doi:10.3892/etm.2021.9616), 2021-01-07
Supplement: Supplementary_Data.pdf [file Supplementary_Data.pdf]

Table SI. Comparison of the parameters between neurosyphilis and non-neurosyphilis patients and age- and gender-matched healthy controls.

| Parameter                      | Neurosyphilis    | Neurosyphilis matched control | P      | Non-neurosyphilis | Non-neurosyphilis matched control | P      |
|--------------------------------|------------------|-------------------------------|--------|-------------------|-----------------------------------|--------|
| Number                         | 87               | 87                            | NA     | 80                | 80                                | NA     |
| Age (y)                        | 51.03±13.09      | 49.53±11.18                   | 0.42   | 35.20±11.26       | 34.6±10.30                        | 0.851  |
| Gender (men, %)                | 54 (62.1)        | 48 (55.17)                    | 0.98   | 18 (22.5)         | 19 (23.8)                         | 1      |
| Peri-WBC (x10 <sup>9</sup> /l) | 6.93±2.62        | 5.89±1.30                     | 0.01   | 6.83±1.77         | 5.91±1.24                         | <0.001 |
| Neutrophil                     | 4.59±2.61        | 3.45±1.00                     | <0.001 | 4.27±1.53         | 3.50±0.91                         | <0.001 |
| Lymphocyte                     | 1.58±0.71        | 1.94±0.48                     | <0.001 | 1.98±0.72         | 1.95±0.50                         | 0.741  |
| NLR (median, IQR)              | 2.87 (2.04-3.89) | 1.74 (1.36-2.21)              | <0.001 | 1.89 (1.45-3.38)  | 1.87 (1.43-2.22)                  | 0.01   |
| ESR <sup>a</sup>               | 16.28±16.98      | 4.12±3.38                     | <0.001 | 6.07±4.24         | 4.12±3.38                         | 0.034  |
| CRP <sup>b</sup>               | 3.95±4.36        | 3.32±2.25                     | 0.418  | 3.38±1.34         | 3.32±2.25                         | 0.531  |

Values are expressed as the mean ± standard deviation, n (%) or the median (interquartile range). <sup>a</sup>Determined in 67 of 87 patients with NS and 52 of 80 patients with non-NS. <sup>b</sup>Determined in 42 of 87 patients with NS and 36 of 80 patients with non-NS. NA, no available; NLR, neutrophil-to-lymphocyte ratio; serum-TRUST, serum toluidine red unheated serum test; CSF, cerebrospinal fluid; WBC, white blood cell; ESR, erythrocyte sedimentation rate; CRP, C-reactive protein; NS, neurosyphilis.

Table SII. Changes in parameters after treatment with penicillin at 6-month follow up of 24 NS patients.

| Parameter                      | Pretreatment     | Post-treatment at 6-month follow up | P-value |
|--------------------------------|------------------|-------------------------------------|---------|
| Serum TRUST (median, IQR)      | 1:16 (1:8-1:32)  | 1:8 (1:4-1:16)                      | <0.001  |
| CSF-WBC                        | 14.71±13.18      | 7.88±7.32                           | 0.027   |
| CSF-protein (mg/dl)            | 69.01±50.17      | 47.12±23.77                         | 0.004   |
| CSF-TRUST (median, IQR)        | 1:2 (0-1:2)      | 0 (0.0)                             | 0.001   |
| Peri-WBC (x10 <sup>9</sup> /l) | 6.90±1.85        | 6.28±1.71                           | 0.284   |
| Neutrophil                     | 4.41±1.75        | 3.83±1.05                           | 0.191   |
| Lymphocyte                     | 1.68±0.67        | 1.85±0.75                           | 0.185   |
| NLR (median, IQR)              | 2.78 (1.68-3.56) | 2.11 (1.65-2.88)                    | 0.025   |

Values are expressed as the mean ± standard deviation, n (%) or the median (interquartile range). NLR, neutrophil-to-lymphocyte ratio; serum-TRUST, serum toluidine red unheated serum test; CSF, cerebrospinal fluid; WBC, white blood cell.
